# Supplementary material for: Navitoclax (ABT263) reduces inflammation and promotes chondrogenic phenotype by clearing senescent osteoarthritic chondrocytes in osteoarthritis
Source: publisher site journal article supplement (doi:10.18632/aging.103177), 2020-07-01
Supplement: Supplementary file [file aging-v12i13-103177-supplementary-material-SD1.pdf]

**SUPPLEMENTARY FIGURE**

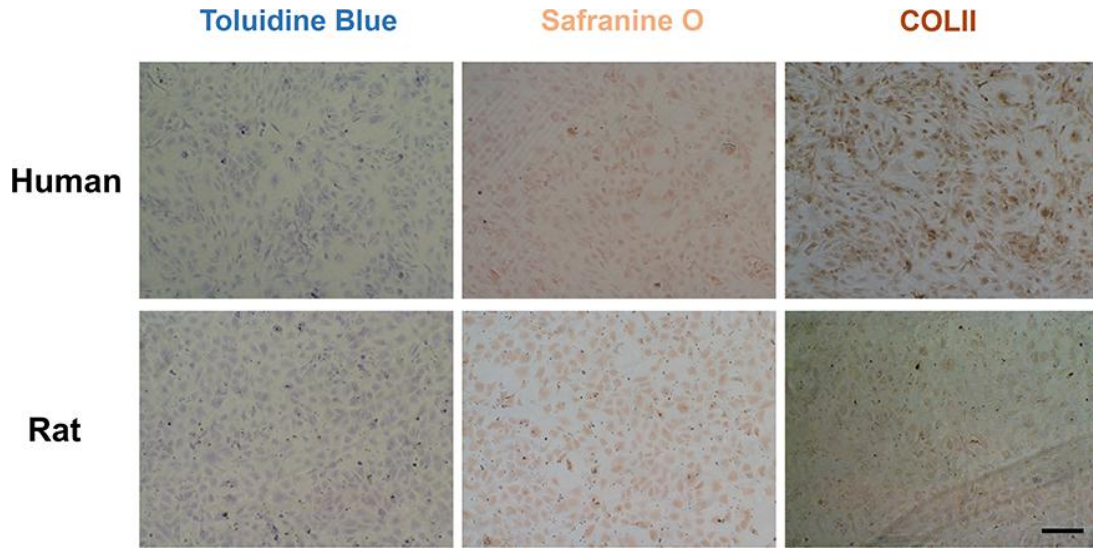

**Supplementary Figure 1. Histological and immunohistochemical staining analysis for COLII and proteoglycan deposition in P1 chondrocytes derived from the TKA surgery patients and SD rat knees. Scale bars: 200  $\mu$ m.**
