# Supplementary material for: Navitoclax (ABT263) reduces inflammation and promotes chondrogenic phenotype by clearing senescent osteoarthritic chondrocytes in osteoarthritis
Source: publisher site journal article supplement (doi:10.18632/aging.103177), 2020-07-01
Supplement: Supplementary file [file aging-v12i13-103177-supplementary-material-SD2.pdf]

## SUPPLEMENTARY TABLE

**Supplementary Table 1. Primers sequences used for real-time polymerase chain reaction (RT-PCR)**

| Gene (human) | Forward primer (5'-3')      | Reverse primer (5'-3')    | Product size (bp) |
|--------------|-----------------------------|---------------------------|-------------------|
| CDKN1A       | TCCAGCGACCTTCCTCATCCAC      | TCCATAGCCTCTACTGCCACCATC  | 108               |
| CDKN2A       | ACACCGCTTCTGCCTTTTCAC       | TGAAGTCGACAGCTTCCGGA      | 119               |
| MMP13        | AATTAAGGAGCATGGCGACTTCTACC  | TGGAGTGGTCAAGACCTAAGGAGTG | 197               |
| ADAMTS5      | TGGCCTCTCCCATGACGATT        | GCTTTCGTGGTAGGTCCAGC      | 188               |
| IL1B         | TGGCTTATTACAGTGGCAATGAGGATG | TGTAGTGGTGGTCGGAGATTCGTAG | 138               |
| IL6          | ATTCAATGAGGAGACTTGCCTGGTG   | ATCTGCACAGCTCTGGCTTGTTTC  | 120               |
| COL2A1       | GGAGCAGCAAGAGCAAGGAGAAG     | TGGACAGCAGGCGTAGGAAGG     | 138               |
| ACAN         | TCCTGGTGTGGCTGCTGTCC        | TCTGGCTCGGTGGTGAACCTCTAG  | 93                |
| SOX9         | CACACGCTGACCACGCTGAG        | GCTGCTGCTGCTCGCTGTAG      | 100               |
| β-ACTIN      | AAGGTGACAGCAGTCCGGTT        | TGTGTGGACTTGGGAGAGG       | 195               |

| Gene (rat) | Forward primer (5'-3')     | Reverse primer (5'-3')     | Product size (bp) |
|------------|----------------------------|----------------------------|-------------------|
| Cdkn1a     | TCCTGGTGATGTCCGACCTGTTC    | GCGGCTCAACTGCTCACTGTC      | 85                |
| Cdkn2a     | GCTGGATGTGCGCGATGCC        | CAGAAGTTATGCCTGTCGGTGACC   | 141               |
| Mmp13      | CATACTACCATCCTGTGACTCTTGCG | CCACATCAGGCACTCCACATCTTG   | 171               |
| Adamts5    | TCTGCCTGCAAGGGAAATGT       | CAATGGCGGTAGGCAAACCTG      | 142               |
| Il1b       | GACAAGAGCTTCAGGAAGGCAGTG   | CACACTAGCAGGTCGTCATCATCC   | 176               |
| IL6        | ATTCAATGAGGAGACTTGCCTGGTG  | ATCTGCACAGCTCTGGCTTGTTTC   | 120               |
| Col2a1     | ACGCTCAAGTCGCTGAACAACC     | TCAATCCAGTAGTCTCCGCTCTTCC  | 131               |
| Acan       | AGTGAACAGCATCTACCAAGACAAGG | GAGTCATTGGAGCGAAGGTTCTGG   | 99                |
| Sox9       | GCGAGCAGCAGCAGCACTC        | TCTGGTGGTCCGGTGTAGTCATACTG | 117               |
| β-Actin    | GCAGGAGTACGATGAGTCCG       | ACGCAGCTCAGTAACAGTCC       | 74                |
